# Supplementary material for: Lactobacillus fermentum JX306 Restrain D-galactose-induced Oxidative Stress of Mice through its Antioxidant Activity
Source: PubMed Central journal article supplement — Pol J Microbiol. 2020 Jun 4;69(2):205–15. doi: 10.33073/pjm-2020-024 (PMC7324864; doi:10.33073/pjm-2020-024), 2020-06-04
Supplement: pjm-69-2-205_Supplement.pdf [file pjm-69-2-205_Supplement.pdf]

Supplementary materials for the article:

Zhang D. et al. *Lactobacillus fermentum* JX306 Restrain D-galactose-induced Oxidative Stress of Mice through its Antioxidant Activity  
Pol J Microbiol. 2020, Vol. 69, No 2, 205–215.

Table SI

The samples of Chinese traditional fermented vegetables collected in this study together with a number of the strains isolated from each sample.

| Province | City      | Strain | Materials          | Province | City         | Strain  | Materials          |
|----------|-----------|--------|--------------------|----------|--------------|---------|--------------------|
| Sichuan  | Chengdu   | 18     | Carrot             | Yunan    | Yuxi         | 9       | Spicy cabbage      |
|          | Chengdu   | 9      | Cabbage            |          | Dali         | 12      | Pickled mustard    |
|          | Leshan    | 10     | Sliced kelp        | Guangxi  | Guilin       | 10      | Pickled cowpea     |
|          |           | 10     | Pickle             |          | Liuzhou      | 9       | Pickled cowpea     |
|          | Meishan   | 10     | Cabbage            | Jilin    | Changchun    | 20      | Spicy cabbage      |
|          |           | 10     | Picked carrot      |          | Baishan      | 10      | Allium macrostemon |
|          | Yaan      | 10     | Picked cowpea      |          | Tonghua      | 14      | Su cotyledon       |
|          | Chongqing | Fuling | 10                 | Carrot   | Heilongjiang | Haerbin | 18                 |
| 10       |           |        | Pickle             | Jixi     |              | 10      | Spicy cabbage      |
| 10       |           |        | Pickled cowpea     | Liaoning | Shenyang     | 20      | Spicy cabbage      |
| Guizhou  | Bijie     | 10     | Pickled cowpea     |          | Tieling      | 9       | Spicy cabbage      |
|          | Xifeng    | 10     | Chinese sauerkraut |          | Youyuan      | 9       | Spicy cabbage      |
|          | Zunyi     | 13     | Pickled cowpea     |          | Linghai      | 10      | Spicy cabbage      |
|          | Guiyang   | 8      | Chinese sauerkraut | Shandong | Qingdao      | 10      | Spicy cabbage      |
|          | Yinjiang  | 10     | Pickled radish     |          | Taian        | 10      | Carrot             |
| Hubei    | Yichang   | 10     | Pickled pepper     |          | Yantai       | 10      | Spicy cabbage      |
|          | Jingzhou  | 10     | Pickle mustard     | Shanxi   | Hanzhong     | 11      | Pickled cowpea     |
| Jiangxi  | Nanchang  | 12     | Sour pepper        | Zhejiang | Jiaxing      | 20      | Chinese sauerkraut |
|          | Gannan    | 10     | Spicy cabbage      | Hunan    | Yiyang       | 10      | Chinese sauerkraut |
|          | Ji'an     | 37     | Chinese sauerkraut |          | Xiangxi      | 12      | Pickled radish     |

Table SII

Primer sequences used for detection of the antioxidant-related genes.

| Gene description       | Primer sequences (5'–3')          | Annealing temperature (°C) | Product length |
|------------------------|-----------------------------------|----------------------------|----------------|
| Thioredoxin reductase  | <b>F:</b> ATTACGAGTGACGACCTGTTCT  | 56                         | 209            |
|                        | <b>R:</b> AACTTGACACCTTGTTGTTCCAG |                            |                |
| Peroxiredoxin1         | <b>F:</b> TGTCCCACGGAGATCATTGG    | 57                         | 180            |
|                        | <b>R:</b> GGTGCGCTTGGGATCTGATA    |                            |                |
| Glutathione reductase  | <b>F:</b> CGATCACGTGGATTACGGCT    | 57                         | 171            |
|                        | <b>R:</b> CGAGGACCATCTGCGAATGT    |                            |                |
| Glutathione peroxidase | <b>F:</b> CAGTCCACCGTGTATGCCTT    | 56                         | 224            |
|                        | <b>R:</b> TTGCCATTCTGGTGTCCGAA    |                            |                |
| $\beta$ -Actin         | <b>F:</b> CCCAGGCATTGCTGACAGG     | 59                         | 141            |
|                        | <b>R:</b> TGGAAGGTGGACAGTGAGGC    |                            |                |
